# Supplementary material for: A systematic overview of single-cell transcriptomics databases, their use cases, and limitations
Source: Front Bioinform. 2024 Jul 8;4:1417428. doi: 10.3389/fbinf.2024.1417428 (PMC11260681; doi:10.3389/fbinf.2024.1417428)
Supplement: Supplementary file 1 [file Table1.XLSX]

## Sheet: Databases
	#	Database	Year	PMID	Citations	URL	Web Interferance	Number of studies /dataset	Number of donors /samples	Number of cells	Data source	Cancer types /Diseases	Number of tissues	Number of organs	Specific focus	Specific type	Download available	Data Type Normalization	Data Type Available	Downlable Data Formats	Data Location	Data Download	Gene Expression Exploration	Pseudotime pattern	Cell-cell communication	TF activity assessments	Annodate your data	Cell Type Marker Plot
	1	White Adipose Atlas	2022	35296864	297	https://gitlab.com/rosen-lab/white-adipose-atlas	Available	1	9	28465	Primary		1		Tissue-specific	White Adipose Tissue	Available	SCTransform	raw counts + normalized	RDS	https://gitlab.com/rosen-lab/white-adipose-atlas	Available
	2	Vasculature of Adult Brain	2022	35084939	136	https://cells.ucsc.edu/?ds=adult-brain-vasc	Available	1	5	161336	Primary		1		Tissue-specific	Vascultature	Available	SCTransform	raw counts + normalized	RDS	https://cells.ucsc.edu/?ds=adult-brain-vasc	Available
	3	Human Tonsil Atlas	2024	38301653	17	https://bioconductor.org/packages/release/data/experiment/html/HCATonsilData.html	Not available	1	17	556000	Primary		1		Tissue-specific	Tonsil	Available	log-normalised	raw counts + normalized	RDS	https://zenodo.org/records/8373756	Available
	4	Human Lung Cell Atlas	2020	33208946	1096	https://hlca.ds.czbiohub.org/	Available	1	3	75000	Primary		1		Tissue-specific	Lung	Available	log-normalised	raw counts	Robj	https://www.synapse.org/#!Synapse:syn21041850/discussion/default	Available
	5	Liver Cell Atlas	2020	31292543	785	http://human-liver-cell-atlas.ie-freiburg.mpg.de/	Available	1	9	10000	Primary		1		Tissue-specific	Liver	Not available						Available
	6	Liver Cell Atlas	2022	35021063	374	https://www.livercellatlas.org/datasets_HCA.php	Available	1	5	167598	Primary		1		Tissue-specific	Liver	Available	log-normalised	raw counts	mtx	https://www.livercellatlas.org/download.php	Available	Available
	7	Kidney Cell Atlas	2019	31604275	315	https://www.kidneycellatlas.org/	Available	1	20	40268	Primary		1		Tissue-specific	Kidney	Available	seurat normalise	raw counts	H5AD	https://www.kidneycellatlas.org/	Available	Available
	8	Heart Cell Atlas	2020	32971526	974	https://www.heartcellatlas.org/	Available	1	14	704296	Primary		1		Tissue-specific	Heart	Available	log-normalised	raw counts + normalized	H5AD	https://www.heartcellatlas.org/	Available	Available
	9	CorneaCellAtlas	2021	33865984	104	http://retinalstemcellresearch.co.uk/CorneaCellAtlas/	Available	1	4	21343	Primary		1		Tissue-specific	Cornea	Available	log-normalised	raw counts	mtx	http://retinalstemcellresearch.co.uk/CorneaCellAtlas/	Available	Available
	10	Human Breast Cell Atlas	2023	37380767	33	https://navinlabcode.github.io/HumanBreastCellAtlas.github.io/	Available	1	126	714331	Primary		1		Tissue-specific	Breast	Available	log-normalised	raw counts	RDS	https://cellxgene.cziscience.com/collections/4195ab4c-20bd-4cd3-8b3d-65601277e731	Available	Available
	11	Organoid	2019	31619793	547	https://bioinf.eva.mpg.de/shiny/sample-apps/scApeX/	Available	1		43498	Primary		1		Tissue-specific	Brain	Not available						Available	Available
	12	First-trimester Developing Human Brain	2023	37824650	30	https://hdca-sweden.scilifelab.se/tissues-overview/brain/	Available	1	26	1665937	Primary		1		Tissue-specific	Brain	Not available						Available
	13	HCA Bone Marrow	2018	30243574	179	https://www.altanalyze.org/ICGS/HCA/splash.php	Available	1	8	100000	Primary		1		Tissue-specific	Bone Marrow	Available	log-normalised	normalized	xlsx	https://www.altanalyze.org/ICGS/HCA/Viewer.php	Available	Available
	14	Human Cell Landscape	2020	32214235	750	https://bis.zju.edu.cn/HCL/	Available	1	63	700000	Primary		50		General	General	Available	log-normalised	raw counts	mtx H5AD	https://figshare.com/articles/dataset/HCL_DGE_Data/7235471	Available
	15	Descartes	2021	33184181	486	https://descartes.brotmanbaty.org/	Available	1	15	4000000	Primary		121	15	General	General	Available		raw counts + normalized	RDS	https://descartes.brotmanbaty.org/bbi/human-gene-expression-during-development/	Available	Available
	16	Tabula Sapiens	2022	35549404	417	https://tabula-sapiens-portal.ds.czbiohub.org/	Available	1	15	500000	Primary		24		General	General	Available		raw counts + normalized	RDS	https://cellxgene.cziscience.com/e/53d208b0-2cfd-4366-9866-c3c6114081bc.cxg/	Available	Available				Available
	17	GTEXsinglecellatlas	2022	35549429	201	https://www.gtexportal.org/home/singleCellOverviewPage	Available	1	16	209126	Primary		8		General	General	Available	log-normalised	raw counts	H5AD	https://www.gtexportal.org/home/downloads/adult-gtex/single_cell	Available
	18	Kidney Single-Cell Atlas	2020	32978267	121	http://www.ruuo-kidney-gene-atlas.com/	Available	1	4	17136	Primary		1		Disease	Kidney Disease	Not available
	19	Kidney Tissue Atlas	2023	37468583	161	https://cellxgene.cziscience.com/collections/bcb61471-2a44-4d00-a0af-ff085512674c	Available	1	93	584843	Primary		1		Disease	Kidney Disease	Available	SCTransform	raw counts + normalized	RDS	https://cellxgene.cziscience.com/collections/bcb61471-2a44-4d00-a0af-ff085512674c	Available	Available
	20	Covid19 Cell Atlas	2021	33915569	586	https://singlecell.broadinstitute.org/single_cell/study/SCP1052/covid-19-lung-autopsy-samples#study-summary	Available	1	32	106792	Primary		11		Disease	Covid-19	Available	log-normalised	raw counts	mtx	https://singlecell.broadinstitute.org/single_cell/study/SCP1052/covid-19-lung-autopsy-samples#study-summary	Available	Available
	21	Lung Atlas of Lethal COVID-19	2022	33915568	458	https://singlecell.broadinstitute.org/single_cell/study/SCP1219/columbia-university-nyp-covid-19-lung-atlas	Available	1	19	116314	Primary		1		Disease	Covid-19	Available	log-normalised		mtx	https://singlecell.broadinstitute.org/single_cell/study/SCP1219/columbia-university-nyp-covid-19-lung-atlas	Available	Available
	22	ddnetbio	2019	31768052	636	http://adsn.ddnetbio.com/	Available	1	6	13214	Primary		1		Disease	Alzheimer	Available	log-normalised	raw counts + normalized	mtx	http://adsn.ddnetbio.com/	Available	Available			Available
	23	Breast Cancer single-cell Atlas	2022	35361816	65	https://bcatlas.tigem.it/tigem/dibernardo/AIRC_atlas_32_ccls/?ds=Atlas_32_ccls	Available	1	32	35276	Primary	1	1		Cancer	Breast Cancer	Available	GF-ICF	raw counts	mtx	https://figshare.com/articles/dataset/Single_Cell_Breast_Cancer_cell-line_Atlas/15022698	Available
	24	Single Cell Breast Cancer	2023	37158690	4	https://mikaqiao.shinyapps.io/scBC/	Available	1	21	117958	Primary	1	1		Cancer	Breast Cancer	Not available						Available
	25	GEO/SRA	2013	23193258	8811	https://www.ncbi.nlm.nih.gov/geo/	Available	112585			Aggregated				General	General	Available	mixed	mixed	mixed	https://www.ncbi.nlm.nih.gov/geo/	Available
	26	scRNA-seq package	2016	NA	0	https://bioconductor.org/packages/release/data/experiment/vignettes/scRNAseq/inst/doc/scRNAseq.html	Not available	61		1641896	Aggregated				General	General	Available	mixed	raw counts	R library	https://bioconductor.org/packages/release/data/experiment/vignettes/scRNAseq/inst/doc/scRNAseq.html	Available
	27	Human Cell Atlas	2017	29206104	1942	https://data.humancellatlas.org/	Available	437	8600	58500000	Aggregated			18	General	General	Available	mixed	mixed	mixed	https://explore.data.humancellatlas.org/projects	Available	Available
	28	scRNASeqDB	2017	29206167	91	https://bioinfo.uth.edu/scrnaseqdb/	Available	38	13440	13440	Aggregated				General	General	Not available						Available
	29	Single Cell Expression Atlas	2018	31665515	475	https://www.ebi.ac.uk/gxa/sc/home	Available	147		10505726	Aggregated				General	General	Available	log-normalised	raw counts + normalized	mtx	https://www.ebi.ac.uk/gxa/sc/download	Available	Available					Available
	30	SCPortalen	2018	29045713	51	http://single-cell.clst.riken.jp/	Available	23		20761	Aggregated				General	General	Not available						Available
	31	SCDevDB	2019	31611909	20	https://scdevdb.deepomics.org	Available	38		13440	Aggregated				General	General	Not available						Available
	32	PanglaoDB	2019	30951143	867	https://panglaodb.se/	Available	305		1126580	Aggregated		74		General	General	Available	log-normalised	raw counts + normalized	RData	https://panglaodb.se/bulk.html	Available						Available
	33	HuBMAP	2019	31597973	368	https://portal.hubmapconsortium.org/	Available	2362	1843		Aggregated		31		General	General	Not available						Available
	34	Curated Database	2020	33247933	174	https://docs.google.com/spreadsheets/d/1En7-UV0k0laDiIfjFkdn7dggyR7jIk3WH8QgXaMOZF0/edit#gid=0	Not available	1946		134393568	Aggregated				General	General	Not available
	35	Human Protein Atlas	2021	34321199	749	https://www.proteinatlas.org/humanproteome/single+cell+type	Available	14		174271	Aggregated		13	14+	General	General	Available	pTPM	raw counts	tsv	https://www.proteinatlas.org/about/download	Available	Available
	36	Single Cell Portal	2021	37502904	8	https://singlecell.broadinstitute.org/single_cell	Available	654		40699488	Aggregated				General	General	Available	mixed	mixed	mixed	https://singlecell.broadinstitute.org/single_cell	Available	Available
	37	UCSC Cell Browser	2021	34244710	127	https://cells.ucsc.edu/?	Available	378			Aggregated				General	General	Available	mixed	mixed	mixed	https://cells.ucsc.edu/?	Available	Available
	38	gEAR	2021	34172972	112	https://www.umgear.org/	Available	1180			Aggregated				General	General	Not available						Available
	39	DISCO	2022	34791375	55	https://www.immunesinglecell.org/	Available	1077	13998	61280618	Aggregated	393	174		General	General	Available	log-normalised		H5AD RDS	https://www.immunesinglecell.org/download	Available	Available					Available
	40	singleCellBase	2023	37730627	3	http://cloud.capitalbiotech.com/SingleCellBase/	Available	464		9158	Aggregated	464	165		General	General	Not available						Available
	41	SingleScan	2023	38062357	0	http://cailab.labshare.cn/SingleScan	Available	109		3077622	Aggregated	49	5+		General	General	Not available						Available
	42	AgeAnno	2023	36200838	14	https://relab.xidian.edu.cn/AgeAnno/#/	Available		226	1298996	Aggregated	28	17		General	General	Available	log-normalised	raw counts	RDS	https://drive.google.com/drive/folders/14fw8OtqRMOZNbMIGhLSaf1G-N9Msdctb	Available	Available		Available	Available		Available
	43	scBrainMap	2023	37195696	2	https://scbrainmap.sysneuro.net/	Available	715		6577222	Aggregated	20	1		General	General	Not available						Available					Available
	44	Human Transcriptome Cell Atlas	2023	36130266	14	https://www.htcatlas.org/	Available		19	24652615	Aggregated		19		General	General	Available	SCTransform	raw counts	RDS	https://www.htcatlas.org/download	Available	Available		Available	Available		Available
	45	Human Universal Single Cell Hub	2023	36318258	10	http://husch.comp-genomics.org/#/search	Available	185		300000	Aggregated		45		General	General	Available	mtx	integrated	H5	http://husch.comp-genomics.org/#/info	Available	Available				Available
	46	Cellxgene	2023	https://doi.org/10.1101/2021.04.05.438318	54	https://cellxgene.cziscience.com/	Available	1284		85100000	Aggregated				General	General	Available	mixed	raw counts + normalized	RDS	https://cellxgene.cziscience.com/datasets	Available	Available
	47	SCInter	2023	38125297	0	https://bio.liclab.net/SCInter/index.php	Available	115	1016		Aggregated				General	General	Not available						Available					Available
	48	OrganoidDB	2023	36271792	4	http://www.inbirg.com/organoid_db/	Available	145		670000	Aggregated		141		General	General	Not available						Available
	49	SC2sepsis	2022	35980286	1	http://www.rjh-sc2sepsis.com/index	Available	71		232226	Aggregated	1			Disease	Sepsis	Not available						Available
	50	SC2disease	2021	33010177	67	http://easybioai.com/sc2disease/	Available			946481	Aggregated	25	29		Disease	Multiple	Not available						Available
	51	Human Lung Cell Atlas	2023	37291214	130	https://cellxgene.cziscience.com/collections/6f6d381a-7701-4781-935c-db10d30de293	Available	49	486	2400000	Aggregated	15	4		Disease	Lung Disease	Available	log-normalised	raw counts + normalized	RDS	https://cellxgene.cziscience.com/collections/6f6d381a-7701-4781-935c-db10d30de293	Available	Available
	52	Covid19cellatlas	2020	32327758	2678	https://www.covid19cellatlas.org/	Available		15		Aggregated	1	29		Disease	Covid-19	Available	log-normalized	raw counts	H5AD	https://www.covid19cellatlas.org/meyer21_airway/	Available	Available
	53	SCovid	2022	34634820	30	http://bio-annotation.cn/scovid	Not available	21		1042227	Aggregated	1	10		Disease	Covid-19	Available	SCTransform	raw counts	txt	http://bio-computing.hrbmu.edu.cn/scovid/#/download	Available	Available					Available
	54	scREAD	2020	33241205	74	https://bmbls.bmi.osumc.edu/scread/	Available	73		713640	Aggregated	1			Disease	Alzheimer	Available		raw counts	RDS	https://bmbls.bmi.osumc.edu/scread/downloads	Available	Available					Available
	55	ssREAD	2023	37745592	0	https://bmblx.bmi.osumc.edu/ssread/	Available	35		2572355	Aggregated	1			Disease	Alzheimer	Not available
	56	SCAD-Brain	2023	37251804	4	https://www.bioinform.cn/SCAD/	Available	21	359	1564825	Aggregated	1	10		Disease	Alzheimer	Not available						Available		Available			Available
	57	JingleBells	2017	28416714	0	https://jinglebells.bgu.ac.il/	Available	302			Aggregated				Cell type	Immune Cells	Not available
	58	EndoDB	2019	30357379	78	https://endotheliomics.shinyapps.io/endodb/	Available	360		5847	Aggregated		15+		Cell type	Endothelial Cells	Available				https://endotheliomics.shinyapps.io/endodb/	Available	Available
	59	huARdb	2022	34606616	9	https://huarc.net/v2/	Available	215		444794	Aggregated	12	24		Cell type	Immune Cells	Not available
	60	ABC portal	2023	35920330	9	http://abc.sklehabc.com/#/home	Available	198		3878881	Aggregated	59	10+		Cell type	Blood Cells	Available	log-normalized	raw counts	RDS	http://abc.sklehabc.com/#/search	Available	Available					Available
	61	CancerSEA	2019	30329142	505	http://biocc.hrbmu.edu.cn/CancerSEA/	Available	74		93475	Aggregated	27			Cancer	Multiple	Not available						Available
	62	scTIME	2021	34117085	33	http://scTIME.sklehabc.com	Available	49		196273	Aggregated	39			Cancer	Multiple	Not available						Available
	63	TISCH	2021	33179754	542	http://tisch1.comp-genomics.org/	Available	76		2045746	Aggregated	27			Cancer	Multiple	Available	log-normalized	normalized	mtx	http://tisch1.comp-genomics.org/gallery/	Available	Available		Available	Available
	64	Compendium papers1	2021	34914499	485	http://cancer-pku.cn:3838/PanC_T/	Available	37	316	397810	Aggregated	21			Cancer	Multiple	Not available						Available
	65	Tumor Immune Cell Atlas	2021	34548323	99	https://singlecellgenomics-cnag-crg.shinyapps.io/TICA/	Available	16	217	500000	Aggregated	13			Cancer	Multiple	Available	log-normalized	integrated	H5AD RDS	https://zenodo.org/records/5205544	Available	Available				Available
	66	TMExplorer	2022	36084081	9	https://figshare.com/projects/TMExplorer_A_Tumour_Microenvironment_Single-cell_RNAseq_Database_and_Search_Tool/101471	Available	48		1438299	Aggregated	26			Cancer	Multiple	Available	mixed	mixed	RDS	https://figshare.com/projects/TMExplorer_A_Tumour_Microenvironment_Single-cell_RNAseq_Database_and_Search_Tool/101471	Available
	67	cancerSCEM	2022	34643725	52	https://ngdc.cncb.ac.cn/cancerscem	Available	28		638341	Aggregated	20			Cancer	Multiple	Available	log-normalized	raw counts	tsv	https://ngdc.cncb.ac.cn/cancerscem/downloads	Available	Available		Available
	68	Compendium papers2	2022	36333338	129	https://gist-fgl.github.io/sc-caf-atlas/	Available	12	226	855271	Aggregated	10	10		Cancer	Multiple	Not available
	69	IMMUcanDB	2023	36459564	12	https://immucanscdb.vital-it.ch/	Available	144		4474385	Aggregated	56			Cancer	Multiple	Available	log-normalized		H5AD	https://immucanscdb.vital-it.ch/	Available	Available					Available
	70	TISCH2	2023	36321662	82	http://tisch.comp-genomics.org/	Available	190		6297320	Aggregated	50			Cancer	Multiple	Available	log-normalized	normalized	mtx	http://tisch.comp-genomics.org/	Available	Available		Available	Available
	71	Curated Cancer Atlas	2023	37258682	51	https://www.weizmann.ac.il/sites/3CA/	Available	77		2591545	Aggregated	24			Cancer	Multiple	Available	TPM	raw counts/TPM	mtx	https://www.weizmann.ac.il/sites/3CA/	Available	Available
	72	Pan-cancer T cell atlas	2023	37248301	54	https://singlecell.mdanderson.org/	Available	27	670	656742	Aggregated	16	21		Cancer	Multiple	Not available						Available					Available
	73	SCAR	2024	37739405	2	http://8.142.154.29/SCAR2023/	Available	190		11301352	Aggregated	21	395		Cancer	Multiple	Not available
	74	scRNA-seq-ICB-cohorts	2024	38328153	0	https://zenodo.org/records/10407126	Available	8		90270	Aggregated	9			Cancer	Multiple	Available	log-normalised	raw counts	RDS	https://zenodo.org/records/10407126	Available	Available
